# Supplementary material
Source: PubMed Central journal article supplement (PMC8808325)
Supplement: jama-e2124776-s003.pdf [file jama-e2124776-s003.pdf]

## Supplemental Online Content

Levy B, Girerd N, Amour J, et al; HYPO-ECMO Trial Group and the International ECMO Network (ECMONet). Effect of moderate hypothermia vs normothermia on 30-day mortality in patients with cardiogenic shock receiving venoarterial extracorporeal membrane oxygenation: a randomized clinical trial. *JAMA*. doi:10.1001/jama.2021.24776

**eMethods.** Investigators and committees and other information

**eFigure 1.** HYPO-ECMO study: treatment protocol and follow up

**eFigure 2.** Kaplan Meier survival estimates during the 60 of VA-ECMO patients treated with moderate hypothermia or normothermia

**eFigure 3.** Kaplan Meier survival estimates during the 180 days of VA-ECMO patients treated with moderate hypothermia or normothermia

**eFigure 4.** Primary endpoint - subgroup analysis and interaction terms (forest plot)

**eFigure 5.** Bayesian analysis: posterior probability distributions for OR for the benefit of moderate hypothermia on mortality at day 30

**eTable.** Characteristics of reference prior probability distributions representing prior beliefs about mortality benefit from moderate hypothermia and probability of treatment effects estimated by Bayesian analysis according to varying prior beliefs

This supplemental material has been provided by the authors to give readers additional information about their work.

## eMethods. Investigators and committees and other information

### List of study sites and principal investigators

| N° center | Center                                                                                            | Adress                              | ZIP Code, City, Country             | Name             | Given name    |
|-----------|---------------------------------------------------------------------------------------------------|-------------------------------------|-------------------------------------|------------------|---------------|
| 1         | CHRU de NANCY, Hôpital Brabois                                                                    | Rue du Morvan,                      | 54500, VANDOEUVRE LES NANCY, France | LEVY             | Bruno         |
| 2         | Hôpitaux Universitaires de Strasbourg. Nouvel Hôpital Civil                                       | 1, place de l'hôpital               | 67091, STRASBOURG, France           | MEZIANI          | Ferhat        |
| 3         | Assistance Publique - Hôpitaux de Paris, Hôpitaux Universitaires Pitié Salpêtrière - Charles Foix | 47-83 boulevard de l'hôpital        | 75013, PARIS, France                | COMBES           | Alain         |
| 4         | CHU de Bordeaux Centre Médico-Chirurgical Magellan                                                | Avenue de Magellan                  | 33604 PESSAC, France                | OUATTARA         | Alexandre     |
| 5         | Hospices Civils de Lyon Hôpital Cardiovasculaire et Pneumologique Louis Pradel                    | 59, boulevard Pinel                 | 69394 LYON, France                  | FELLAHI          | Jean-Luc      |
| 6         | CH Annecy Genevois, site Annecy                                                                   | 1 Avenue de l'Hôpital,              | 74370 EPAGNY METZ-TESSY, France     | SIRODOT          | Michel        |
| 7         | CHU de Rouen, Hôpital Charles Nicolle                                                             | 1 Rue De Germont                    | 76100 ROUEN, France                 | BESNIER          | Emmanuel      |
| 8         | CHU d'Amiens-Picardie                                                                             | 1 Rond-Point du Pr Christian Cabrol | 80054 AMIENS, France                | DUPONT           | Hervé         |
| 9         | CHU de Nantes, Hôpital G&R Laënnec                                                                | Boulevard Professeur Jacques Monod  | 44800 SAINT-HERBLAIN, France        | ROZEC            | Bertrand      |
| 10        | CHU de Rennes, Hôpital Pontchaillou                                                               | 2 Rue Henri le Guilloux,            | 35000 RENNES, France                | FLECHER          | Erwan         |
| 11        | CHU de Toulouse, Hôpital Rangueil                                                                 | 1 Avenue du Professeur Jean Poulhès | 31400 TOULOUSE, France              | DELMAS           | Clément       |
| 12        | CHRU de Montpellier, Hôpital Arnaud de Villeneuve                                                 | 371, avenue Doyen Gaston Giraud     | 34295 MONTPELLIER, France           | COLSON           | Pascal        |
| 13        | Assistance Publique - Hôpitaux de Paris, Hôpital Bichat Claude Bernard                            | 46 Rue Henri Huchard,               | 75018 PARIS, France                 | TIMSIT           | Jean-François |
| 14        | Assistance Publique - Hôpitaux, Hôpitaux Universitaires Pitié Salpêtrière - Charles Foix          | 47-83 boulevard de l'hôpital        | 75013, PARIS, France                | BOUGLE           | Adrien        |
| 15        | CHU de Grenoble, Hôpital Michallon                                                                | Boulevard de la Chantourne,         | 38700 LA TRONCHE, France            | GAIDE-CHEVRONNAY | Lucie         |
| 16        | CHR de Besançon, Hôpital Jean Minjoz                                                              | 3 boulevard Fleming                 | 25030 BESANCON, France              | CAPELLIER        | Gilles        |

| N° center | Center                                                                     | Adress                | ZIP Code, City, Country  | Name    | Given name  |
|-----------|----------------------------------------------------------------------------|-----------------------|--------------------------|---------|-------------|
| 17        | Hôpitaux Universitaires de Marseille, Groupe Hospitalier de la Timone      | 264 Rue Saint-Pierre, | 13005 MARSEILLE, France  | GUIDON  | Catherine   |
| 18        | Assistance Publique - Hôpitaux de Paris, Hôpital Européen Georges Pompidou | 20 Rue Leblanc,       | 75015 PARIS, France      | CHOLLEY | Bernard     |
| 19        | Hôpitaux Universitaires de Strasbourg. Nouvel Hôpital Civil                | 1, place de l'hôpital | 67091 STRASBOURG, France | MERTES  | Paul Michel |

### Study Monitoring and Independent Data Safety Monitoring (DSMB)

The trial used a Web-based electronic CRF (CleanWeb®, Telemedecine Technology, France and Ennov Clinical 7.5®, Ennov, France).

Data monitoring was performed by the sponsors (CHRU de Nancy, Department of Research and Innovation and each participating national centers).

Furthermore, CHRU de Nancy had full access to all patient charts and checked all data recorded within the electronic CRF.

Data management and statistical analyses were performed by the Centre d'Investigation Clinique plurithématique de Nancy.

An independent data safety monitoring board (DSMB) was set up prior to recruitment of the first patient. The DSMB met after the planned interim analysis.

It was composed of two physicians (Pr Alain CARIOU, AP-HP, Paris and Pr Michel SLAMA, AP-HP, Paris) and one methodologist – biostatistician (Dr Etienne GAYAT, AP-HP, Paris).

They reviewed the interim analyses (blinded to allocation of groups) and decided on the termination of the study.

### Study protocol amendments

There were 7 amendments to the study protocol (see Appendix Protocol). They were approved by investigators, the study methodologist – statistician, the sponsor (CHRU de Nancy), the Comité de Protection des Personnes (CPP, French institutional review board) and the Agence Nationale de Sécurité du Médicament et des produits de santé (ANSM, French Health Authorities).

**Randomization**

Randomization was performed through a secured server using a predefined randomization list stratified on the centers and using blocks (alternative block of 2 and 4). The randomization list was created by the data-manager in charge of the trial and verified by another analysis-scientist. These professionals had no interactions with the investigators and investigators were not aware of block sizes and stratification as these details were not mentioned (on purpose) in the study protocol.

**eFigure 1.** HYPO-ECMO study: treatment protocol and follow up

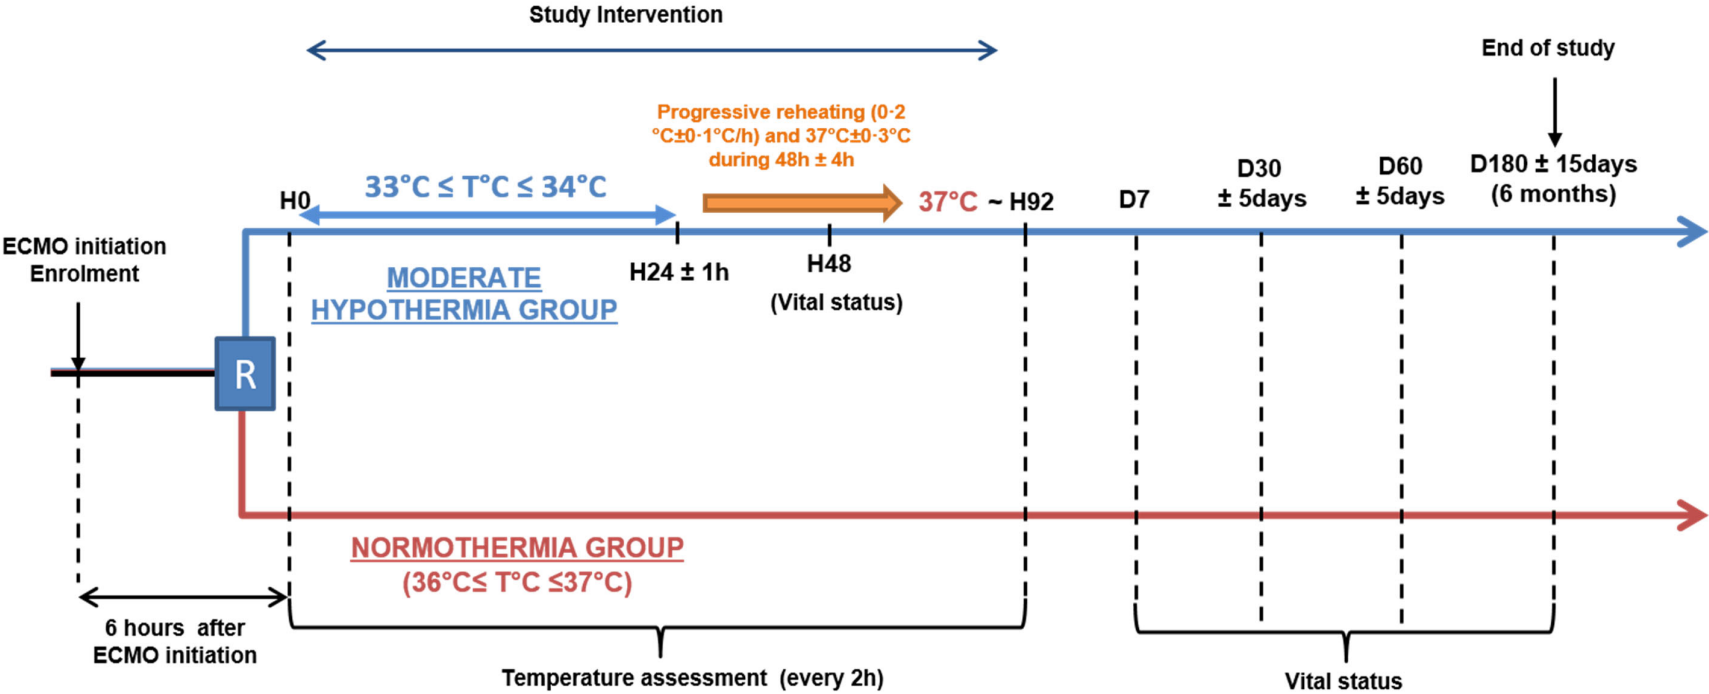

Abbreviation: H stands for hour and D for days.

**eFigure 2.** Kaplan Meier survival estimates during the 60 of VA-ECMO patients treated with moderate hypothermia or normothermia

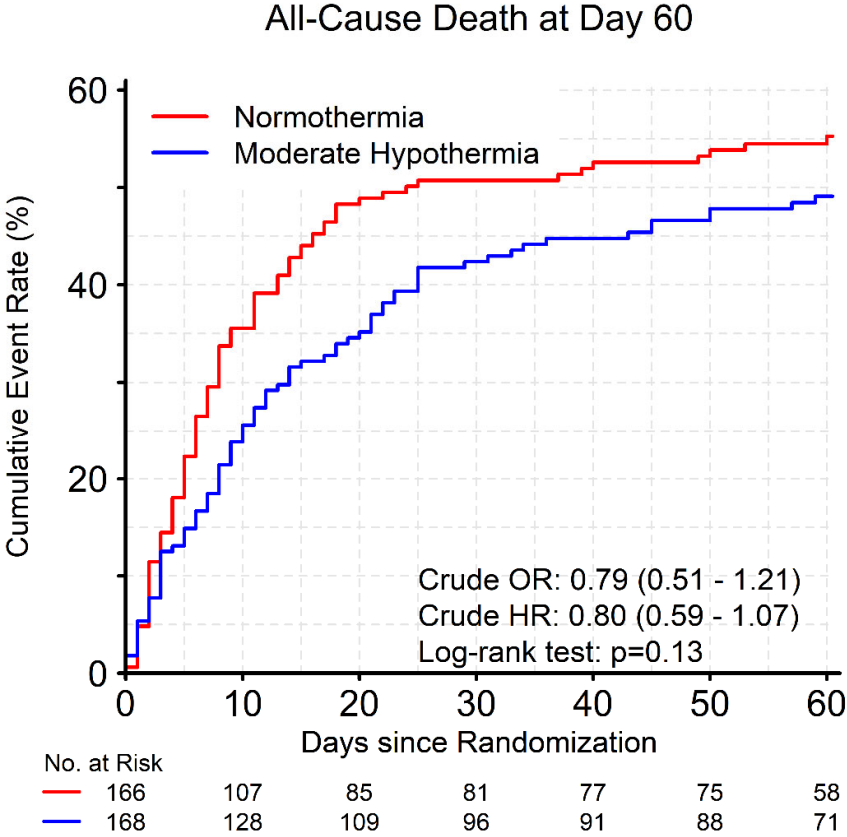

**Figure 3.** Kaplan Meier survival estimates during the 180 days of VA-ECMO patients treated with moderate hypothermia or normothermia

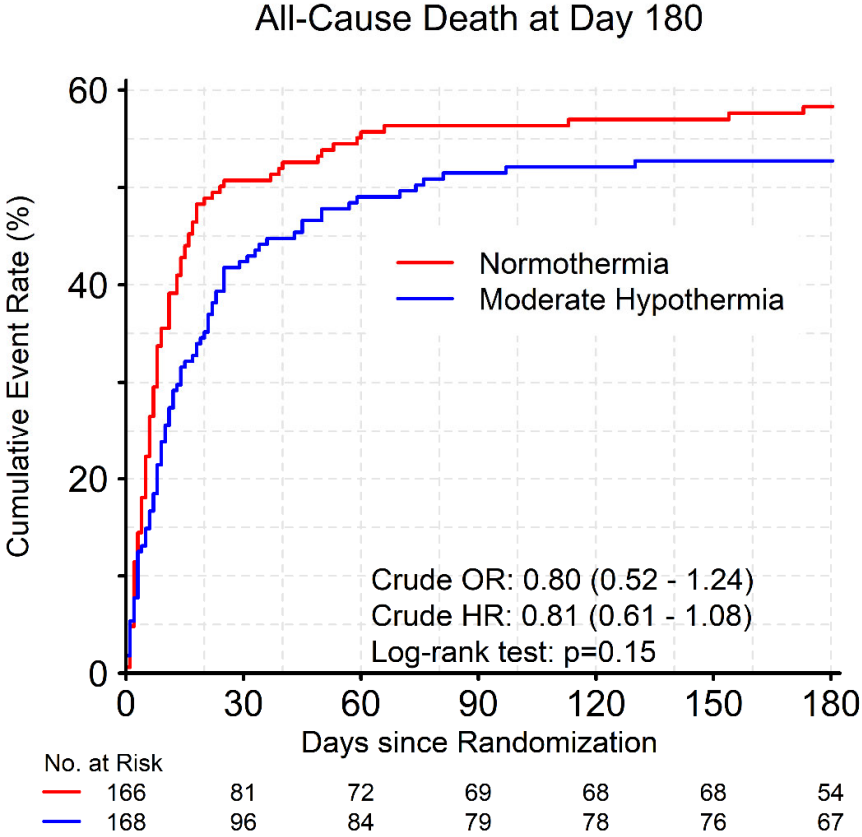

**eFigure 4.** Primary endpoint - subgroup analysis and interaction terms (forest plot)

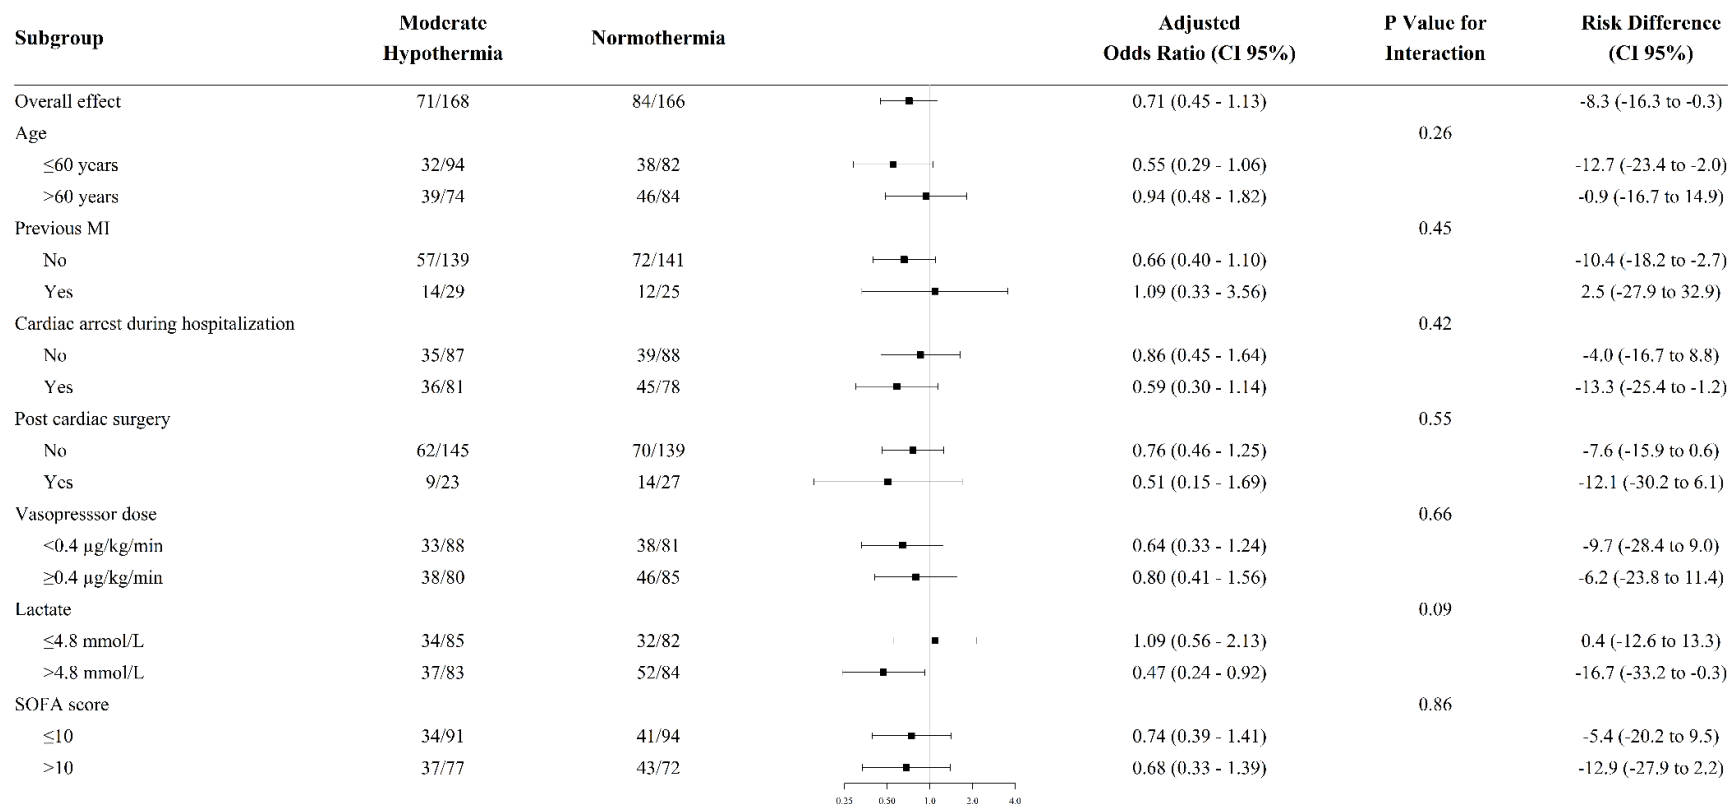

The primary endpoint was mortality at 30 days. Each subgroup variable was evaluated at baseline. For each continuous variable (age, vasopressor dose, lactate and SOFA score), subgroups were defined by dichotomizing the variable according to the median observed in the study population. Adjusted odds-ratios were calculated using logistic model after Multiple Imputation by Chained Equations (see Supplementary Appendix for more details). An interaction test was performed for each binary endpoint using the Wald test for the cross-product of intervention group and binary endpoint in adjusted logistic model. Risk difference with confidence interval adjusted for center was calculated using binomial GEE model with identity link. CI denotes confidence interval.



**eFigure 5.** Bayesian analysis: posterior probability distributions for OR for the benefit of moderate hypothermia on mortality at day 30

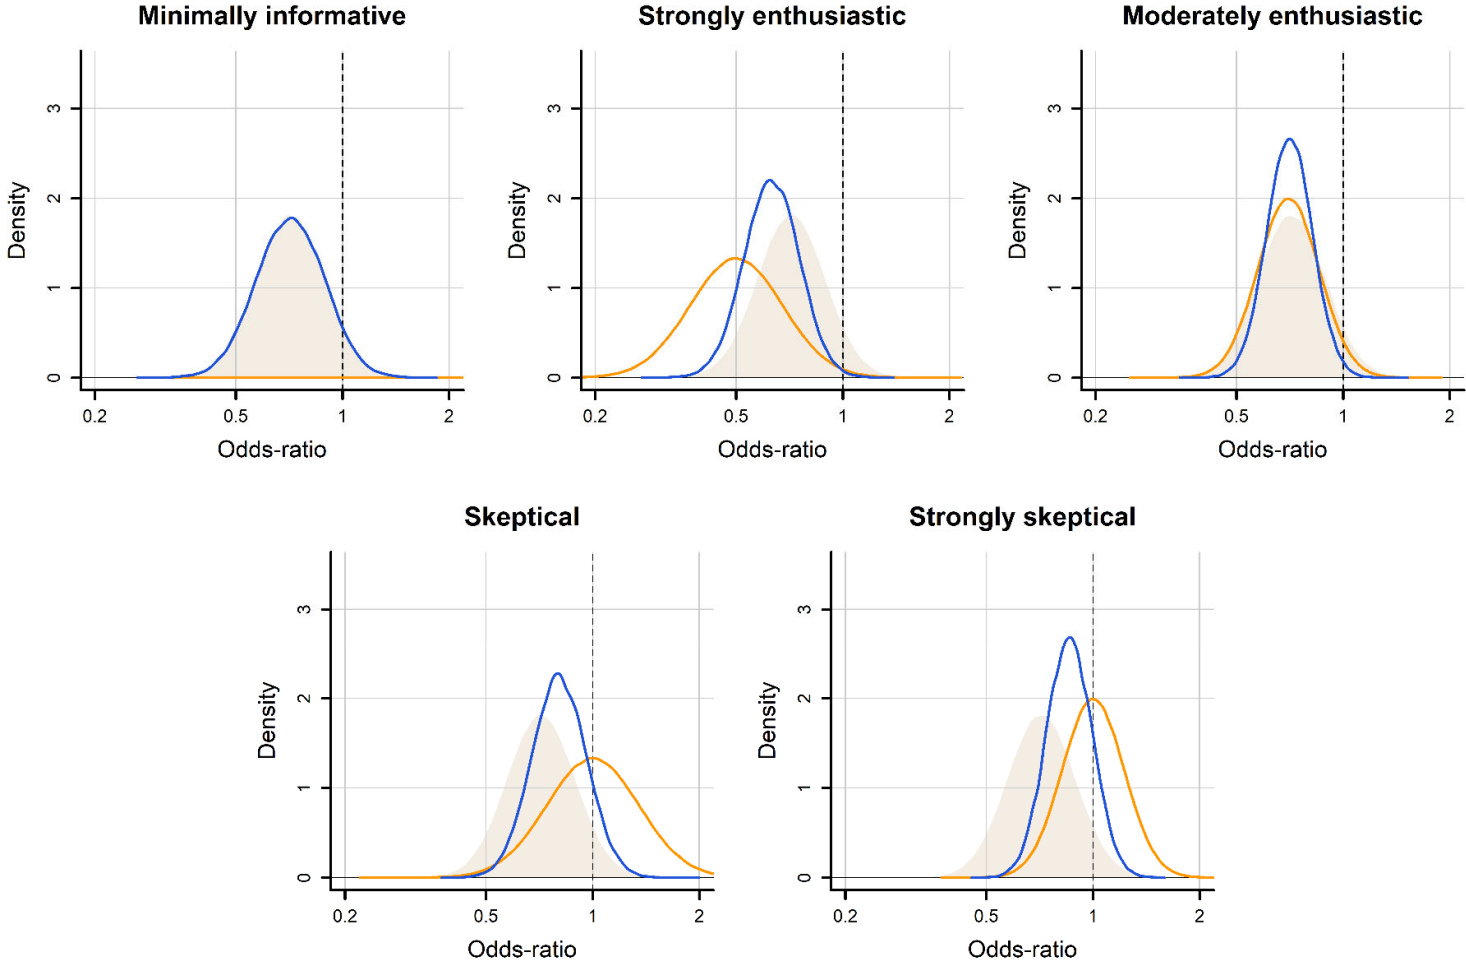

OR: odds-ratio. Orange lines indicate the reference prior. The shaded areas indicate the effect (OR) of moderate hypothermia observed in the

trial. Blue lines indicate posterior probability distribution. The vertical dashed line indicates where  $OR = 1$  to provide a visual reference point. Reference prior is combined with the effect of moderate hypothermia observed in the trial to compute the posterior probability for the effect of moderate hypothermia. Variation in the posterior distribution arises from variation in the prior. This approach assess the influence of prior enthusiasm or skepticism for moderate hypothermia on the interpretation of the trial's results.

**eTable.** Characteristics of reference prior probability distributions representing prior beliefs about mortality benefit from moderate hypothermia and probability of treatment effects estimated by Bayesian analysis according to varying prior beliefs

| Prior belief            | Assumed median OR | Assumed SD of logarithm OR | Posterior median OR (95% credible interval) | Posterior probability that true OR is < specified threshold, % |          |          |          |          |          |
|-------------------------|-------------------|----------------------------|---------------------------------------------|----------------------------------------------------------------|----------|----------|----------|----------|----------|
|                         |                   |                            |                                             | OR < 1                                                         | OR < 0.9 | OR < 0.8 | OR < 0.7 | OR < 0.6 | OR < 0.5 |
| Minimally informative   | 1                 | 10                         | 0.71 (0.46 - 1.09)                          | 94                                                             | 85       | 70       | 47       | 22       | 6        |
| Strongly enthusiastic   | 0.50              | 0.30                       | 0.63 (0.44 - 0.89)                          | 100                                                            | 98       | 91       | 72       | 40       | 10       |
| Moderately enthusiastic | 0.70              | 0.20                       | 0.71 (0.53 - 0.94)                          | 99                                                             | 95       | 80       | 48       | 14       | 1        |
| Skeptical               | 1                 | 0.30                       | 0.80 (0.57 - 1.14)                          | 89                                                             | 74       | 49       | 22       | 5        | 0        |
| Strongly skeptical      | 1                 | 0.20                       | 0.86 (0.64 - 1.15)                          | 85                                                             | 63       | 32       | 9        | 1        | 0        |

Abbreviations: OR, odds-ratio; SD, standard deviation.
