# Supplementary material
Source: PubMed Central journal article supplement (PMC8808325)
Supplement: jama-e2124776-s004.pdf [file jama-e2124776-s004.pdf]

\*Indicates required information. Only first name, last name, and suffix will appear in PubMed.

| *Group Name(s): HYPO-ECMO Trial Group and the International ECMO Network (ECMONet) |               |                  |                                                                                                   |                                          |                                                         |                                                                                            |  |  |  |  |                       |
|------------------------------------------------------------------------------------|---------------|------------------|---------------------------------------------------------------------------------------------------|------------------------------------------|---------------------------------------------------------|--------------------------------------------------------------------------------------------|--|--|--|--|-----------------------|
| *First Name and Middle Initial(s)                                                  | *Last Name    | Academic Degrees | Institution                                                                                       | Location (city, state/province, country) | Role or Contribution, eg, chair, principal investigator | Group (if more than 1 Group listed in the byline) and/or Subgroup (eg, Steering Committee) |  |  |  |  | *Suffix (eg, Jr, III) |
| Mathieu                                                                            | Mattei        | MD               | CHRU de NANCY                                                                                     | Vandoeuvre lès Nancy, France             | Investigator                                            |                                                                                            |  |  |  |  |                       |
| Carine                                                                             | Thivillier    | MD               | CHRU de NANCY                                                                                     | Vandoeuvre lès Nancy, France             | Investigator                                            |                                                                                            |  |  |  |  |                       |
| Thomas                                                                             | Auchet        | MD               | CHRU de NANCY                                                                                     | Vandoeuvre lès Nancy, France             | Investigator                                            |                                                                                            |  |  |  |  |                       |
| Pierre                                                                             | Perez         | MD               | CHRU de NANCY                                                                                     | Vandoeuvre lès Nancy, France             | Investigator                                            |                                                                                            |  |  |  |  |                       |
| Caroline                                                                           | Fritz         | MD               | CHRU de NANCY                                                                                     | Vandoeuvre lès Nancy, France             | Investigator                                            |                                                                                            |  |  |  |  |                       |
| Pablo                                                                              | Maureira      | MD, PhD          | CHRU de NANCY                                                                                     | Vandoeuvre lès Nancy, France             | collaborator                                            |                                                                                            |  |  |  |  |                       |
| Maxime                                                                             | Hubert        | MD               | CHRU de NANCY                                                                                     | Vandoeuvre lès Nancy, France             | collaborator                                            |                                                                                            |  |  |  |  |                       |
| Yihua                                                                              | Liu           | MD, PhD          | CHRU de NANCY                                                                                     | Vandoeuvre lès Nancy, France             | collaborator                                            |                                                                                            |  |  |  |  |                       |
| Ferhat                                                                             | Meziani       | MD, PhD          | Hôpitaux Universitaires de Strasbourg. Nouvel Hôpital Civil                                       | Strasbourg, France                       | Local Principal investigator                            |                                                                                            |  |  |  |  |                       |
| Hamid                                                                              | Merdji        | MD               | Hôpitaux Universitaires de Strasbourg                                                             | Strasbourg, France                       | Investigator                                            |                                                                                            |  |  |  |  |                       |
| Alexandra                                                                          | Monnier       | MD               | Hôpitaux Universitaires de Strasbourg                                                             | Strasbourg, France                       | Investigator                                            |                                                                                            |  |  |  |  |                       |
| Raphaël                                                                            | Clere-Jehl    | MD               | Hôpitaux Universitaires de Strasbourg                                                             | Strasbourg, France                       | Investigator                                            |                                                                                            |  |  |  |  |                       |
| Ania                                                                               | Nieszkowska   | MD               | Assistance Publique - Hôpitaux de Paris, Hôpitaux Universitaires Pitié Salpêtrière - Charles Foix | Paris, France                            | Investigator                                            |                                                                                            |  |  |  |  |                       |
| Marc                                                                               | Pineton       | MD               | Assistance Publique - Hôpitaux de Paris, Hôpitaux Universitaires Pitié Salpêtrière - Charles Foix | Paris, France                            | Investigator                                            |                                                                                            |  |  |  |  |                       |
| Juliette                                                                           | Chommeloux    | MD               | Assistance Publique - Hôpitaux de Paris, Hôpitaux Universitaires Pitié Salpêtrière - Charles Foix | Paris, France                            | Investigator                                            |                                                                                            |  |  |  |  |                       |
| Guillaume                                                                          | Hékimian      | MD               | Assistance Publique - Hôpitaux de Paris, Hôpitaux Universitaires Pitié Salpêtrière - Charles Foix | Paris, France                            | Investigator                                            |                                                                                            |  |  |  |  |                       |
| Guillaume                                                                          | Lebreton      | MD               | Assistance Publique - Hôpitaux de Paris, Hôpitaux Universitaires Pitié Salpêtrière - Charles Foix | Paris, France                            | Collaborator                                            |                                                                                            |  |  |  |  |                       |
| Astrid                                                                             | Quessard      | MD               | CHU de Bordeaux                                                                                   | Pessac, France                           | Investigator                                            |                                                                                            |  |  |  |  |                       |
| Julien                                                                             | Imbault       | MD               | CHU de Bordeaux                                                                                   | Pessac, France                           | Investigator                                            |                                                                                            |  |  |  |  |                       |
| Alain                                                                              | Rémy          | MD               | CHU de Bordeaux                                                                                   | Pessac, France                           | Investigator                                            |                                                                                            |  |  |  |  |                       |
| Mathieu                                                                            | Pernot        | MD               | CHU de Bordeaux                                                                                   | Pessac, France                           | Collaborator                                            |                                                                                            |  |  |  |  |                       |
| Pierre                                                                             | Joseph        | MD               | Hospices Civils de Lyon                                                                           | Lyon, France                             | Investigator                                            |                                                                                            |  |  |  |  |                       |
| Giovanni                                                                           | Scollo        | MD               | Hospices Civils de Lyon                                                                           | Lyon, France                             | Investigator                                            |                                                                                            |  |  |  |  |                       |
| Matteo                                                                             | Pozzi         | MD, PhD          | Hospices Civils de Lyon                                                                           | Lyon, France                             | Collaborator                                            |                                                                                            |  |  |  |  |                       |
| Étienne                                                                            | Escudier      | MD               | CH Annecy Genevois                                                                                | Epagny Metz-Tessy, France                | Investigator                                            |                                                                                            |  |  |  |  |                       |
| Michel                                                                             | Muller        | MD               | CH Annecy Genevois                                                                                | Epagny Metz-Tessy, France                | Investigator                                            |                                                                                            |  |  |  |  |                       |
| Didier                                                                             | Dorez         | MD               | CH Annecy Genevois                                                                                | Epagny Metz-Tessy, France                | Investigator                                            |                                                                                            |  |  |  |  |                       |
| Michel                                                                             | Sirodot       | MD               | CH Annecy Genevois                                                                                | Epagny Metz-Tessy, France                | Local Principal Investigator                            |                                                                                            |  |  |  |  |                       |
| Fabien                                                                             | Doguet        | MD               | CHU de Rouen                                                                                      | Rouen, France                            | Investigator                                            |                                                                                            |  |  |  |  |                       |
| Vincent                                                                            | Scherrer      | MD               | CHU de Rouen                                                                                      | Rouen, France                            | Investigator                                            |                                                                                            |  |  |  |  |                       |
| Chadi                                                                              | Aludaat       | MD               | CHU de Rouen                                                                                      | Rouen, France                            | Collaborator                                            |                                                                                            |  |  |  |  |                       |
| Michael                                                                            | Bernasinski   | MD               | CHU d'Amiens-Picardie                                                                             | Amiens, France                           | Investigator                                            |                                                                                            |  |  |  |  |                       |
| Elie                                                                               | Zogheib       | MD, PhD          | CHU d'Amiens-Picardie                                                                             | Amiens, France                           | Investigator                                            |                                                                                            |  |  |  |  |                       |
| Thierry                                                                            | Caus          | MD, PhD          | CHU d'Amiens-Picardie                                                                             | Amiens, France                           | collaborator                                            |                                                                                            |  |  |  |  |                       |
| Philippe                                                                           | Bizouarn      | MD, PhD          | CHU de Nantes                                                                                     | Saint-Herblain, France                   | Investigator                                            |                                                                                            |  |  |  |  |                       |
| Mickael                                                                            | Vourc'h       | MD, PhD          | CHU de Nantes                                                                                     | Saint-Herblain, France                   | Investigator                                            |                                                                                            |  |  |  |  |                       |
| Jean-Christian                                                                     | Roussel       | MD, PhD          | CHU de Nantes                                                                                     | Saint-Herblain, France                   | collaborator                                            |                                                                                            |  |  |  |  |                       |
| Thomas                                                                             | Senage        | MD, PhD          | CHU de Nantes                                                                                     | Saint-Herblain, France                   | collaborator                                            |                                                                                            |  |  |  |  |                       |
| Erwan                                                                              | Flecher       | MD, PhD          | CHU de Rennes                                                                                     | Rennes, France                           | Local Principal Investigator                            |                                                                                            |  |  |  |  |                       |
| Jean-Philippe                                                                      | Verhoye       | MD, PhD          | CHU de Rennes                                                                                     | Rennes, France                           | collaborator                                            |                                                                                            |  |  |  |  |                       |
| Antoine                                                                            | Roisne        | MD               | CHU de Rennes                                                                                     | Rennes, France                           | Investigator                                            |                                                                                            |  |  |  |  |                       |
| Sébastien                                                                          | Biedermann    | MD               | CHU de Rennes                                                                                     | Rennes, France                           | Investigator                                            |                                                                                            |  |  |  |  |                       |
| Fanny                                                                              | Vardon-Bounes | MD, PhD          | CHU de Toulouse                                                                                   | Toulouse, France                         | Investigator                                            |                                                                                            |  |  |  |  |                       |
| Laure                                                                              | Crognier      | MD               | CHU de Toulouse                                                                                   | Toulouse, France                         | Investigator                                            |                                                                                            |  |  |  |  |                       |
| Jean                                                                               | Porterie      | MD               | CHU de Toulouse                                                                                   | Toulouse, France                         | collaborator                                            |                                                                                            |  |  |  |  |                       |

\*Indicates required information. Only first name, last name, and suffix will appear in PubMed.

| *First Name and Middle Initial(s) | *Last Name  | Academic Degrees | Institution                                                                | Location (city, state/province, country) | Role or Contribution, eg, chair, principal investigator | Group (if more than 1 Group listed in the byline) and/or Subgroup (eg, Steering Committee) |  |  |  |  |  |  | *Suffix (eg, Jr, III) |
|-----------------------------------|-------------|------------------|----------------------------------------------------------------------------|------------------------------------------|---------------------------------------------------------|--------------------------------------------------------------------------------------------|--|--|--|--|--|--|-----------------------|
| Pascal                            | Colson      | MD, PhD          | CHRU de Montpellier                                                        | Montpellier, France                      | Local Principal Investigator                            |                                                                                            |  |  |  |  |  |  |                       |
| Philippe                          | Gaudard     | MD, PhD          | CHRU de Montpellier                                                        | Montpellier, France                      | Investigator                                            |                                                                                            |  |  |  |  |  |  |                       |
| Philippe                          | Rouviere    | MD               | CHRU de Montpellier                                                        | Montpellier, France                      | collaborator                                            |                                                                                            |  |  |  |  |  |  |                       |
| Lila                              | Bouadma     | MD, PhD          | Assistance Publique - Hôpitaux de Paris, Hôpital Bichat Claude Bernard     | Paris, France                            | Investigator                                            |                                                                                            |  |  |  |  |  |  |                       |
| Fabrice                           | Sinnah      | MD, PhD          | Assistance Publique - Hôpitaux de Paris, Hôpital Bichat Claude Bernard     | Paris, France                            | Investigator                                            |                                                                                            |  |  |  |  |  |  |                       |
| Patrick                           | Nataf       | MD, PhD          | Assistance Publique - Hôpitaux de Paris, Hôpital Bichat Claude Bernard     | Paris, France                            | collaborator                                            |                                                                                            |  |  |  |  |  |  |                       |
| Marylou                           | Para        | MD               | Assistance Publique - Hôpitaux de Paris, Hôpital Bichat Claude Bernard     | Paris, France                            | collaborator                                            |                                                                                            |  |  |  |  |  |  |                       |
| Pauline                           | Dureau      | MD               | AP-HP, Hôpitaux Universitaires Pitié Salpêtrière - Charles Foix            | Paris, France                            | Investigator                                            |                                                                                            |  |  |  |  |  |  |                       |
| Nima                              | Djavid      | MD               | AP-HP, Hôpitaux Universitaires Pitié Salpêtrière - Charles Foix            | Paris, France                            | Investigator                                            |                                                                                            |  |  |  |  |  |  |                       |
| Adrien                            | Bouglé      | MD, PhD          | AP-HP, Hôpitaux Universitaires Pitié Salpêtrière - Charles Foix            | Paris, France                            | Investigator                                            |                                                                                            |  |  |  |  |  |  |                       |
| Pascal                            | Leprince    | MD, PhD          | AP-HP, Hôpitaux Universitaires Pitié Salpêtrière - Charles Foix            | Paris, France                            | Collaborator                                            |                                                                                            |  |  |  |  |  |  |                       |
| Géraldine                         | Dessertaine | MD               | CHU de Grenoble,                                                           | La Tronche, France                       | Investigator                                            |                                                                                            |  |  |  |  |  |  |                       |
| Michel                            | Durand      | MD               | CHU de Grenoble,                                                           | La Tronche, France                       | Investigator                                            |                                                                                            |  |  |  |  |  |  |                       |
| Pierre                            | Albaladejo  | MD               | CHU de Grenoble,                                                           | La Tronche, France                       | Investigator                                            |                                                                                            |  |  |  |  |  |  |                       |
| Cecile                            | Martin      | MD               | CHU de Grenoble,                                                           | La Tronche, France                       | Collaborator                                            |                                                                                            |  |  |  |  |  |  |                       |
| François                          | Belon       | MD               | CHR de Besançon,                                                           | Besançon, France                         | Investigator                                            |                                                                                            |  |  |  |  |  |  |                       |
| Gael                              | Piton       | MD, PhD          | CHR de Besançon,                                                           | Besançon, France                         | Investigator                                            |                                                                                            |  |  |  |  |  |  |                       |
| Hadrien                           | Winiszewski | MD               | CHR de Besançon,                                                           | Besançon, France                         | Investigator                                            |                                                                                            |  |  |  |  |  |  |                       |
| Andrea                            | Perroti     | MD               | CHR de Besançon,                                                           | Besançon, France                         | collaborator                                            |                                                                                            |  |  |  |  |  |  |                       |
| David                             | Tonon       | MD               | Hôpitaux Universitaires de Marseille, Groupe Hospitalier de la Timone      | Marseille, France                        | Investigator                                            |                                                                                            |  |  |  |  |  |  |                       |
| Bernard                           | Cholley     | MD, PhD          | Assistance Publique - Hôpitaux de Paris, Hôpital Européen Georges Pompidou | Paris, France                            | Local Principal Investigator                            |                                                                                            |  |  |  |  |  |  |                       |
| Diane                             | Zlotnik     | MD               | Assistance Publique - Hôpitaux de Paris, Hôpital Européen Georges Pompidou | Paris, France                            | Investigator                                            |                                                                                            |  |  |  |  |  |  |                       |
| Paul                              | Achouh      | MD, PhD          | Assistance Publique - Hôpitaux de Paris, Hôpital Européen Georges Pompidou | Paris, France                            | collaborator                                            |                                                                                            |  |  |  |  |  |  |                       |
| Hélène                            | Nougue      | MD, PhD          | Assistance Publique - Hôpitaux de Paris, Hôpital Européen Georges Pompidou | Paris, France                            | Investigator                                            |                                                                                            |  |  |  |  |  |  |                       |
| Olivier                           | Collange    | MD, PhD          | Hôpitaux Universitaires de Strasbourg                                      | Strasbourg, France                       | Investigator                                            |                                                                                            |  |  |  |  |  |  |                       |
| Paul Michel                       | Mertes      | MD, PhD          | Hôpitaux Universitaires de Strasbourg                                      | Strasbourg, France                       | Local Principal Investigator                            |                                                                                            |  |  |  |  |  |  |                       |
| Michel                            | Kindo       | MD, PhD          | Hôpitaux Universitaires de Strasbourg                                      | Strasbourg, France                       | collaborator                                            |                                                                                            |  |  |  |  |  |  |                       |
