# Supplementary material
Source: PubMed Central journal article supplement (PMC8808325)
Supplement: jama-e2124776-s005.pdf [file jama-e2124776-s005.pdf]

## Data Sharing Statement

Levy. Effect of Moderate Hypothermia vs Normothermia on 30-Day Mortality in Patients With Cardiogenic Shock Receiving Venoarterial Extracorporeal Membrane Oxygenation. *JAMA*. Published February 01, 2022. doi:10.1001/jama.2021.24776

### Data

**Data available:** Yes

**Data types:** Deidentified participant data

**How to access data:** [blevy5463@gmail.com](mailto:blevy5463@gmail.com)

**When available:** beginning date: 01-01-2023, end date: 01-01-2029

### Supporting Documents

**Document types:** Statistical/analytic code, Informed consent form

**How to access documents:** [blevy5463@gmail.com](mailto:blevy5463@gmail.com)

**When available:** beginning date: 01-01-2023, end date: 01-01-2029

### Additional Information

**Who can access the data:** The deidentified patient data will be accessible after publication of the Article upon request to the corresponding author (Bruno Levy, Nancy University Hospital, [blevy5463@gmail.com](mailto:blevy5463@gmail.com)). The analysis proposal will be evaluated by the steering committee and the sponsor. The adequacy of the proposal with French data protection law will be verified by the sponsor. An access to the data will be granted following this process for data access proposals that meet both scientific requirements (evaluated by the steering committee) and legal requirements (evaluated by the sponsor – possibly with the direct authorization of the Commission Nationale de l'Informatique et des Libertés (CNIL)).

**Types of analyses:** to be discussed with the steering committee

**Mechanisms of data availability:** After approval of a proposal

**Any additional restrictions:** none
